# Supplementary material
Source: HighWire-hosted journal article supplement (https://svn.smart01.highwire.org/content/svn-2023-002414)
Supplement: inline-supplementary-material-1 [file inline-supplementary-material-1.pdf]

### Supplementary Online Content

**Table S1.** Single Nucleotide Polymorphism Associated with Serum total Homocysteine

**Figure S1.** Leave-one-out analysis on the MR estimates by removing each SNP individually

**Table S2.** Baseline Characteristics Before and After IPTW (Inverse Probability of Treatment Weighting)

**Table S3.** Association between tHcy and Intracranial Aneurysm Based on IPTW Analysis

**Table S4.** Additive Interaction Analysis on tHcy and Hypertension

**Table S1.** Single Nucleotide Polymorphism Associated with Serum total Homocysteine

| SNP       | Chr | Position  | Nearest gene | EA | EAF  | NEA | Beta   | SE    | P        |
|-----------|-----|-----------|--------------|----|------|-----|--------|-------|----------|
| rs2275565 | 1   | 237048676 | MTR          | G  | 0.79 | T   | 0.0542 | 0.009 | 1.96e-10 |
| rs9369898 | 6   | 49382193  | MUT          | A  | 0.62 | G   | 0.0449 | 0.007 | 2.17e-10 |
| rs7130284 | 11  | 89148372  | NOX4         | C  | 0.93 | T   | 0.1242 | 0.013 | 1.88e-20 |
| rs234709  | 21  | 44486964  | CBS          | C  | 0.55 | T   | 0.0718 | 0.007 | 3.9e-24  |
| rs42648   | 7   | 89977760  | GTPB10       | G  | 0.6  | A   | 0.0395 | 0.007 | 1.97e-08 |
| rs1801222 | 10  | 17156151  | CUBN         | A  | 0.34 | G   | 0.0453 | 0.007 | 8.43e-10 |
| rs2251468 | 12  | 121405126 | HNF1A        | C  | 0.35 | A   | 0.0512 | 0.007 | 1.28e-12 |
| rs957140  | 11  | 89201627  | NOX4         | G  | 0.55 | A   | 0.045  | 0.008 | 2.43e-08 |
| rs2851391 | 21  | 43067294  | CBS          | T  | 0.47 | C   | 0.056  | 0.008 | 1.7e-12  |

Abbreviation: SNP, single nucleotide polymorphism ; Chr, chromosome; EA, effect allele; EAF, effect allele frequency; NEA non-effective allele; Beta, coefficient presented as the number of SD difference in homocysteine concentrations per allele; SE, standard error.

**Figure S1.** Leave-one-out analysis on the MR estimates by removing each SNP individually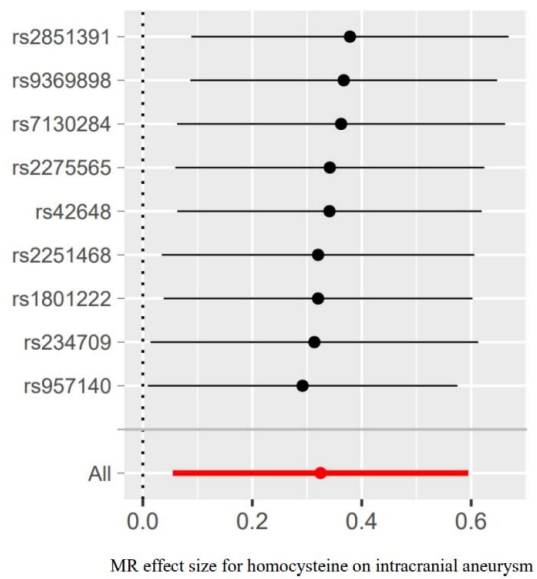

The leave-one-out analysis confirmed that Mendelian Randomization result for causal association of tHcy with intracranial aneurysm was robust and reliable as it was not driven by any single SNP.

| <b>Table S2</b> Baseline Characteristics Before and After IPTW (Inverse Probability of Treatment Weighting) |                    |                 |          |                    |                    |          |
|-------------------------------------------------------------------------------------------------------------|--------------------|-----------------|----------|--------------------|--------------------|----------|
|                                                                                                             | <b>Before IPTW</b> |                 |          | <b>IPTW</b>        |                    |          |
|                                                                                                             | <b>non-IAs</b>     | <b>IAs</b>      | <b>p</b> | <b>non-IAs</b>     | <b>IAs</b>         | <b>p</b> |
|                                                                                                             | <b>n = 9831</b>    | <b>n = 5496</b> |          | <b>n = 15464.1</b> | <b>n = 15084.1</b> |          |
| <b>Sex, No.(%)</b>                                                                                          |                    |                 | <0.001   |                    |                    | 0.447    |
| Male                                                                                                        | 5693 (57.9)        | 2254 (41.0)     |          | 8021.1 (51.9)      | 7935.8 (52.6)      |          |
| Female                                                                                                      | 4138 (42.1)        | 3242 (59.0)     |          | 7440.0 (48.1)      | 7148.3 (47.4)      |          |
| <b>Age, mean, (SD), y</b>                                                                                   | 63.9 (13.5)        | 57.8 (12.0)     | <0.001   | 61.3 (13.9)        | 61.2 (13.2)        | 0.717    |
| <b>Age class, No.(%)</b>                                                                                    |                    |                 | <0.001   |                    |                    | 0.654    |
| 18-39 y                                                                                                     | 477 (4.9)          | 394 (7.2)       |          | 934.7 (6.0)        | 964.7 (6.4)        |          |
| 40-59 y                                                                                                     | 2981 (30.3)        | 2656 (48.3)     |          | 5779.9 (37.4)      | 5679.4 (37.7)      |          |
| ≥60 y                                                                                                       | 6373 (64.8)        | 2446 (44.5)     |          | 8749.5 (56.6)      | 8439.9 (56.0)      |          |
| <b>BP class, mmHg,</b>                                                                                      |                    |                 | <0.001   |                    |                    | 0.746    |
| <b>SBP / DBP, No.(%)</b>                                                                                    |                    |                 |          |                    |                    |          |
| < 140 / < 90                                                                                                | 3449 (35.1)        | 2434 (44.3)     |          | 5947.3 (38.5)      | 5767.8 (38.2)      |          |
| 140~159 / 90~99                                                                                             | 3404 (34.6)        | 1111 (20.2)     |          | 4484.0 (29.0)      | 4268.2 (28.3)      |          |
| 160~179 / 100~109                                                                                           | 2065 (21.0)        | 888 (16.2)      |          | 2953.0 (19.1)      | 2973.3 (19.7)      |          |
| ≥180 / ≥110                                                                                                 | 913 (9.3)          | 1063 (19.3)     |          | 2079.8 (13.4)      | 2074.8 (13.8)      |          |
| <b>Hyperlipidemia, No.(%)</b>                                                                               |                    |                 | <0.001   |                    |                    | 0.688    |
| No                                                                                                          | 4726 (48.1)        | 3060 (55.7)     |          | 7900.4 (51.2)      | 7764.3 (51.5)      |          |
| Yes                                                                                                         | 5105 (51.9)        | 2436 (44.3)     |          | 7563.7 (48.9)      | 7319.8 (48.5)      |          |
| <b>Diabetes, type 1 and 2</b>                                                                               |                    |                 | <0.001   |                    |                    | 0.803    |
| No                                                                                                          | 7098 (72.2)        | 4319 (78.6)     |          | 11559.5 (74.8)     | 11241.9 (74.5)     |          |
| Yes                                                                                                         | 2733 (27.8)        | 1177 (21.4)     |          | 3904.6 (25.2)      | 3842.2 (25.5)      |          |
| <b>Smoke*, No.(%)</b>                                                                                       |                    |                 | <0.001   |                    |                    | 0.823    |
| No                                                                                                          | 7684 (78.2)        | 4778 (86.9)     |          | 12601.2 (81.5)     | 12318.3 (81.7)     |          |
| Yes                                                                                                         | 2147 (21.8)        | 718 (13.1)      |          | 2862.9 (18.5)      | 2765.8 (18.3)      |          |
| <b>Alcohol use†, No.(%)</b>                                                                                 |                    |                 | <0.001   |                    |                    | 0.507    |
| No                                                                                                          | 7892 (90.0)        | 4775 (92.6)     |          | 12711.3 (81.0)     | 13719.7 (91.2)     |          |
| Yes                                                                                                         | 875 (9.98)         | 383 (7.43)      |          | 2752.8 (9.0)       | 1364.4 (8.8)       |          |

\* †: missing data was imputed for 830 (5.4%) and 1,402 (9.1%) patients about smoking and alcohol using by Multiple Imputation utilizing Mice package (3.14) for R (4.2.2)

Abbreviation: BP, blood pressure; SBP, systolic blood pressure; DBP, diastolic blood pressure.

| <b>Table S3</b> Association between tHcy and Intracranial Aneurysm Based on IPTW Analysis |                |                |                  |                             |                     |                             |
|-------------------------------------------------------------------------------------------|----------------|----------------|------------------|-----------------------------|---------------------|-----------------------------|
| <b>IPTW</b>                                                                               |                |                |                  |                             |                     |                             |
|                                                                                           | <b>non-IAs</b> | <b>IAs</b>     | <b>Crude OR</b>  |                             | <b>Adjusted OR*</b> |                             |
|                                                                                           | n=15464.1      | n=15084.1      | <b>95% CI</b>    | <b>p</b>                    | <b>95% CI</b>       | <b>p</b>                    |
| tHcy <sup>†</sup> (SD), umol/L                                                            | 12.5 (6.2)     | 14.9 (10.7)    | 1.51 (1.46;1.56) | < .001                      | 1.56 (1.50;1.61)    | < .001                      |
| tHcy <sup>‡</sup>                                                                         |                |                | 1.28 (1.26;1.31) | < .001                      | 1.31 (1.28;1.34)    | < .001                      |
| Group tHcy, No.(%)                                                                        |                |                |                  | <b>&lt;.001<sup>§</sup></b> |                     | <b>&lt;.001<sup>§</sup></b> |
| Low                                                                                       | 12321.0 (79.7) | 10078.4 (66.8) | Reference.       |                             | Reference.          |                             |
| Moderate                                                                                  | 2868.3 (18.5)  | 4423.3 (29.3)  | 1.89 (1.79;1.99) | < .001                      | 1.97 (1.69;2.30)    | < .001                      |
| High                                                                                      | 274.9 (1.8)    | 582.4 (3.9)    | 2.59 (2.23;3.00) | < .001                      | 0.97 (0.87;1.08)    | .558                        |
| Moderate + High                                                                           | 796 (16.1)     | 1487 (30.0)    | 1.95 (1.85;2.05) | < .001                      | 1.71 (1.61;1.81)    | < .001                      |

P-value for OR (odd ratios) was based on Wald tests;

\*: Odds ratios was adjusted by age, sex, blood pressure level and smoke;

†: OR was estimated by per 1 standard difference increase of tHcy (8.2 μmol/L);

‡: OR was estimated by per 5μmol/L increase of tHcy;

§: P value for trend.

| Table S4 Additive Interaction Analysis on tHcy and Hypertension |            |              |        |            |              |        |
|-----------------------------------------------------------------|------------|--------------|--------|------------|--------------|--------|
|                                                                 | PSM Model  |              |        | IPTW Model |              |        |
|                                                                 | OR*        | 95% CI†      | p      | OR*        | 95% CI†      | p      |
| tHcy<15umol/L + no HBP                                          | Reference. |              |        | Reference. |              |        |
| tHcy≥15umol/L + no HBP                                          | 1.18       | (1.08; 1.30) | <0.001 | 1.16       | (1.11; 1.22) | <0.001 |
| tHcy<15umol/L + HBP                                             | 0.68       | (0.61; 0.75) | <0.001 | 0.71       | (0.67; 0.75) | <0.001 |
| tHcy≥15umol/L + HBP                                             | 2.51       | (2.25; 2.81) | <0.001 | 2.14       | (2.01; 2.27) | <0.001 |
| Estimation of Interaction                                       |            |              |        |            |              |        |
| Statistic                                                       | Value      | 95% CI       |        | Value      | 95% CI       |        |
| RERI                                                            | 1.65       | (1.29;2.01)  |        | 1.27       | (1.27;1.44)  |        |
| AP                                                              | 0.66       | (0.58;0.74)  |        | 0.60       | (0.54;0.65)  |        |

\*: OR, Odds Ratio

†: CI, Confidence Interval

‡: RERI, Relative excess risk due to interaction (part of the total effect that is due to interaction), defined as  $OR_{A+B} - OR_{A+B-} - OR_{A-B+} - 1$ ; RERI > 1 means positive interaction or more than additivity.<sup>[1]</sup> RERI < 1 means negative interaction or less than additivity.

§: AP, Proportion attributable to interaction (proportion of the combined effect that is due to interaction),  $AP = RERI / OR_{A+B+}$ <sup>[1]</sup>. AP > 0 means positive interaction or more than additivity.

AP < 0 means negative interaction or less than additivity.

### References.

1. Knol MJ, VanderWeele TJ, Groenwold RH, Klungel OH, Rovers MM, Grobbee DE. Estimating measures of interaction on an additive scale for preventive exposures. *EUR J EPIDEMIOL.* 2011;26(6):433-8. doi:10.1007/s10654-011-9554-9
